# Supplementary material for: Zircon luminescence dating revisited
Source: Copernicus journal article supplement (doi:10.5194/gchron-2024-10), 2024-04-22
Supplement: Supplementary file 1 [file gchron-2024-10-supplement.pdf]

# Supplement: Zircon luminescence dating revisited

Christoph Schmidt<sup>1</sup>, Théo Halter<sup>1</sup>, Paul R. Hanson<sup>2</sup>, Alexey Ulianov<sup>3</sup>, Benita Putlitz<sup>3</sup>, Georgina E. King<sup>1</sup>, Sebastian Kreutzer<sup>4</sup>

<sup>1</sup>Institute of Earth Surface Dynamics, University of Lausanne, Lausanne, 1015, Switzerland

<sup>2</sup>School of Natural Resources, University of Lincoln-Nebraska, Lincoln, 68583, United States of America

<sup>3</sup>Institute of Earth Sciences, University of Lausanne, Lausanne, 1015, Switzerland

<sup>4</sup>Institute of Geography, Heidelberg University, 69120 Heidelberg, Germany

Correspondence to: Christoph Schmidt (christoph.schmidt@unil.ch)

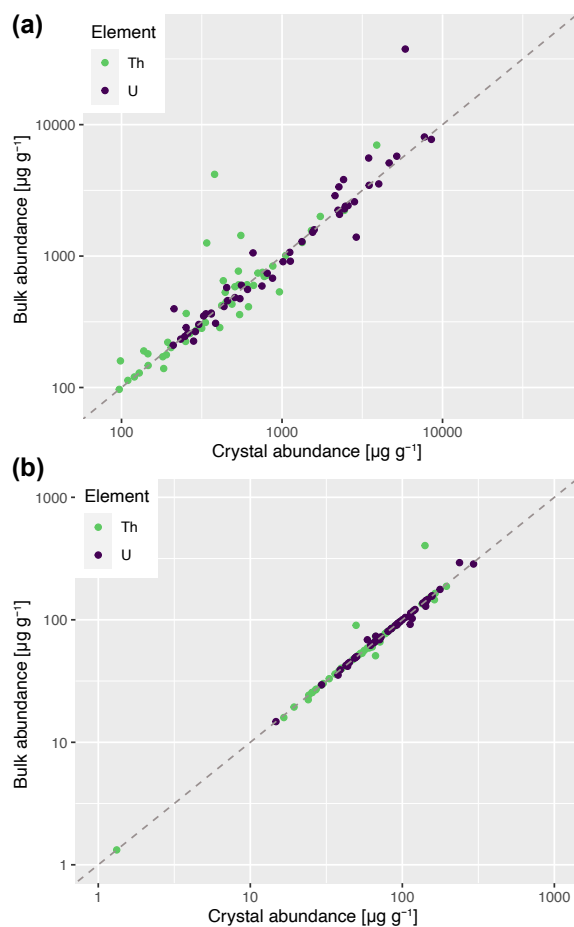

**Figure S1.** Comparison of Th and U contents determined by signal integration of the entire transient ablation signal, including inclusions and impurities (bulk), or the signal component related to the ‘pure’ zircon crystal structure (crystal) for samples ZR229 (a) and Can1 (b). The dashed line represents the 1:1 line.

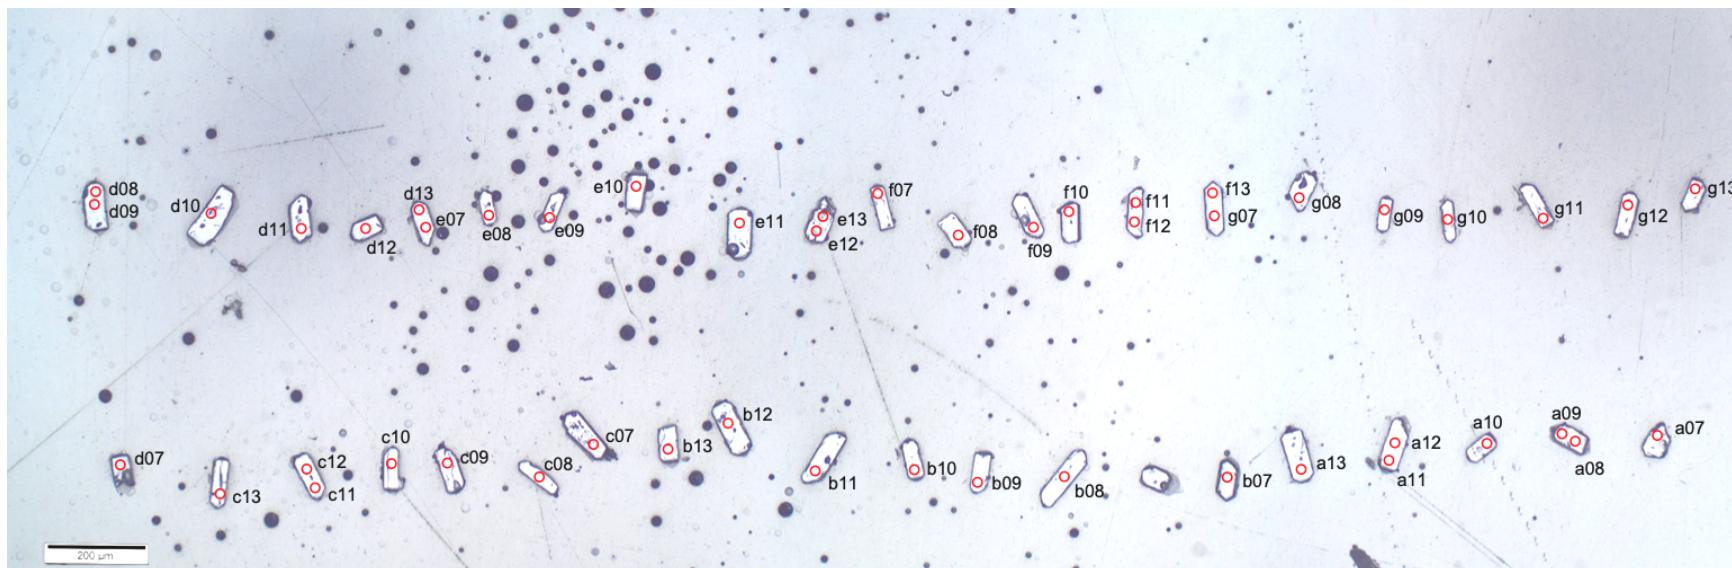

**Figure S2.** Scan of the mount with sample ZR229 with analytical spots indicated as red circles.

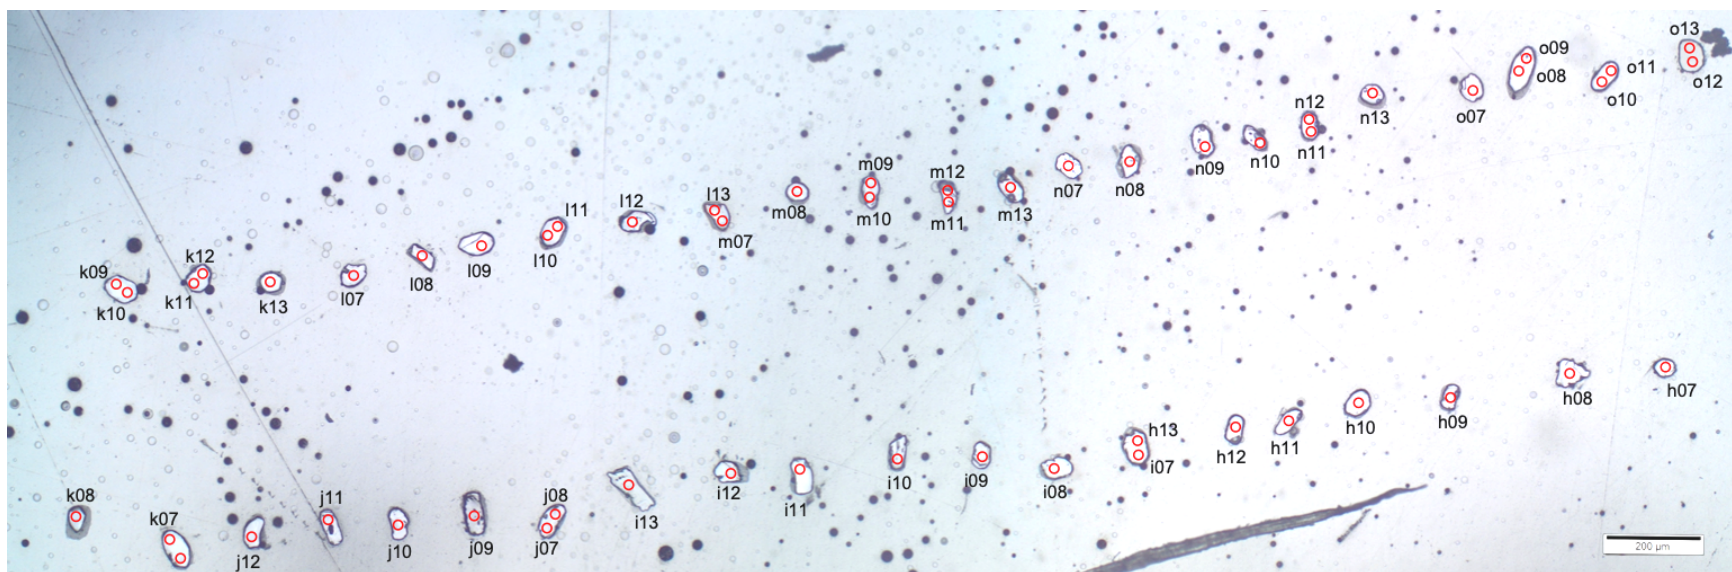

**Figure S3.** Scan of the mount with sample Can1 with analytical spots indicated as red circles.

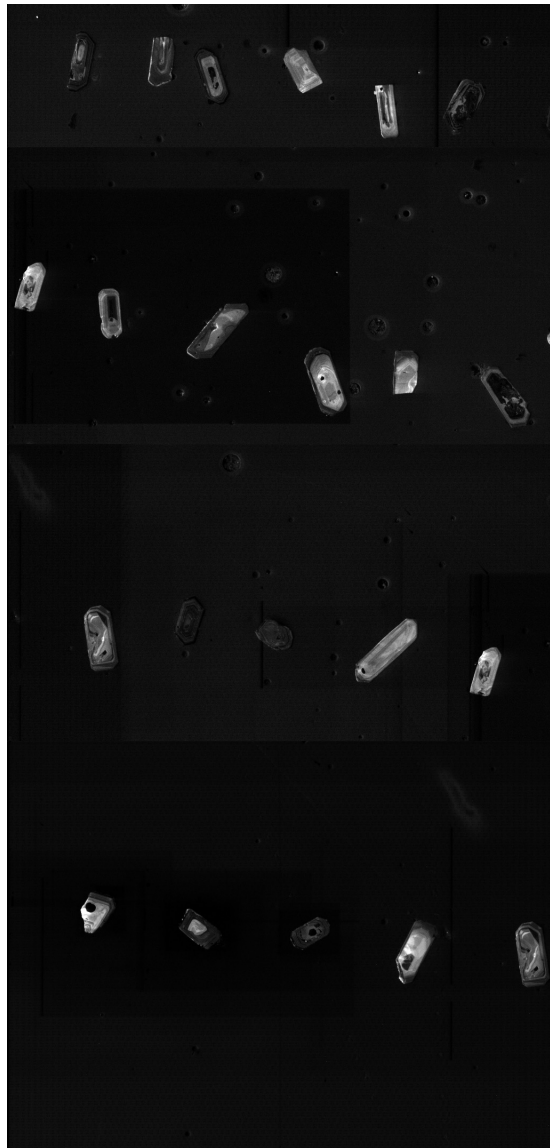

SEM MAG: 182 x    DET: KL  
HV: 10.0 kV    DATE: 08/11/23  
VAC: HiVac    Device: MV2300VP  
500 um    Vega @Tescan  
SEM Geosciences Uni Lausanne

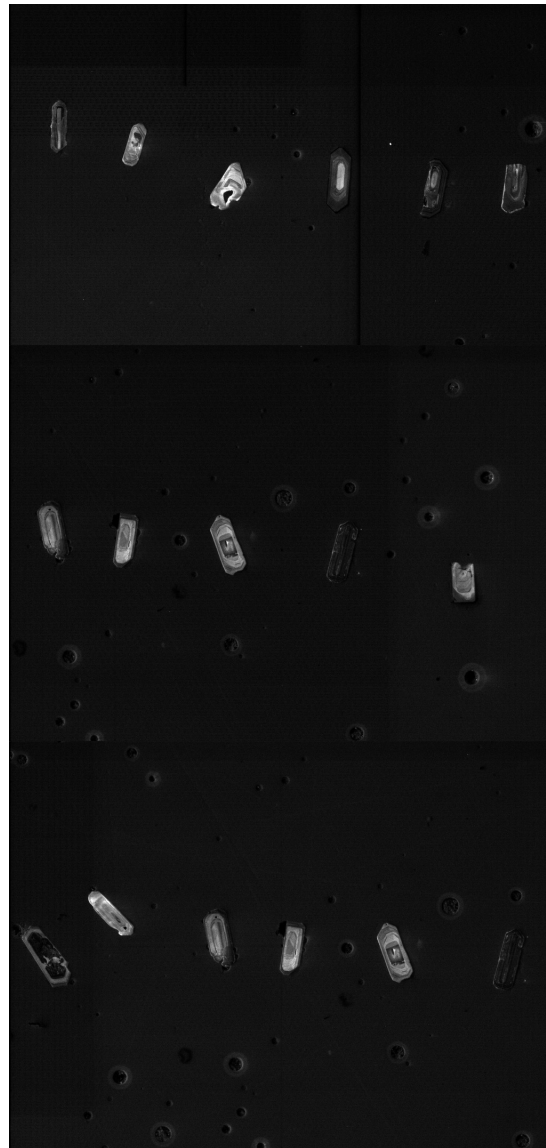

SEM MAG: 182 x    DET: KL  
HV: 10.0 kV    DATE: 08/11/23  
VAC: HiVac    Device: MV2300VP  
500 um    Vega @Tescan  
SEM Geosciences Uni Lausanne

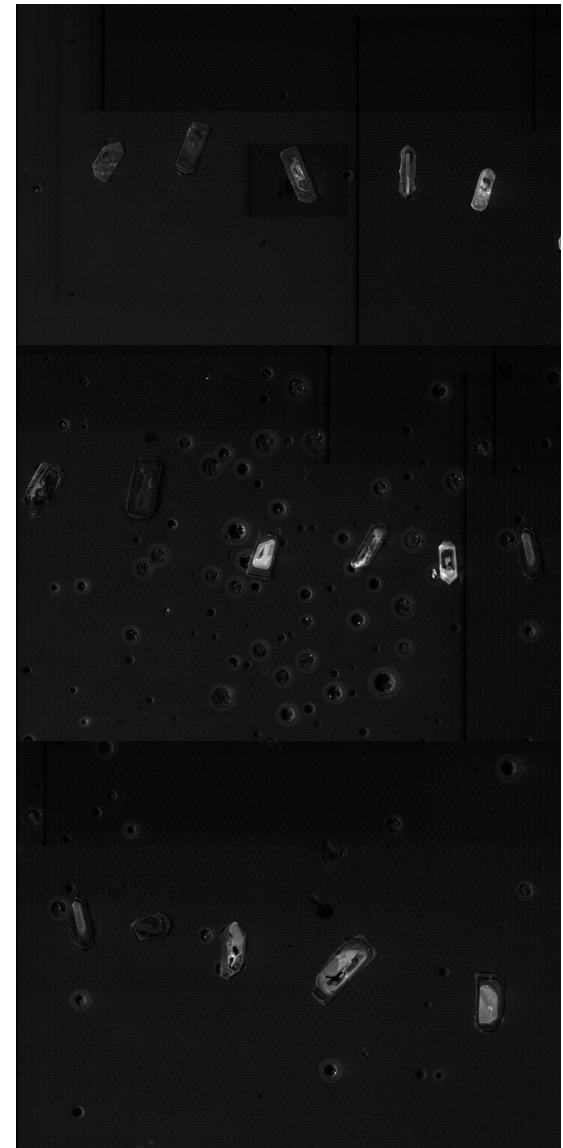

SEM MAG: 182 x    DET: KL  
HV: 10.0 kV    DATE: 08/11/23  
VAC: HiVac    Device: MV2300VP  
500 um    Vega @Tescan  
SEM Geosciences Uni Lausanne

**Figure S4.** Cathodoluminescence images of the zircon sample ZR229.

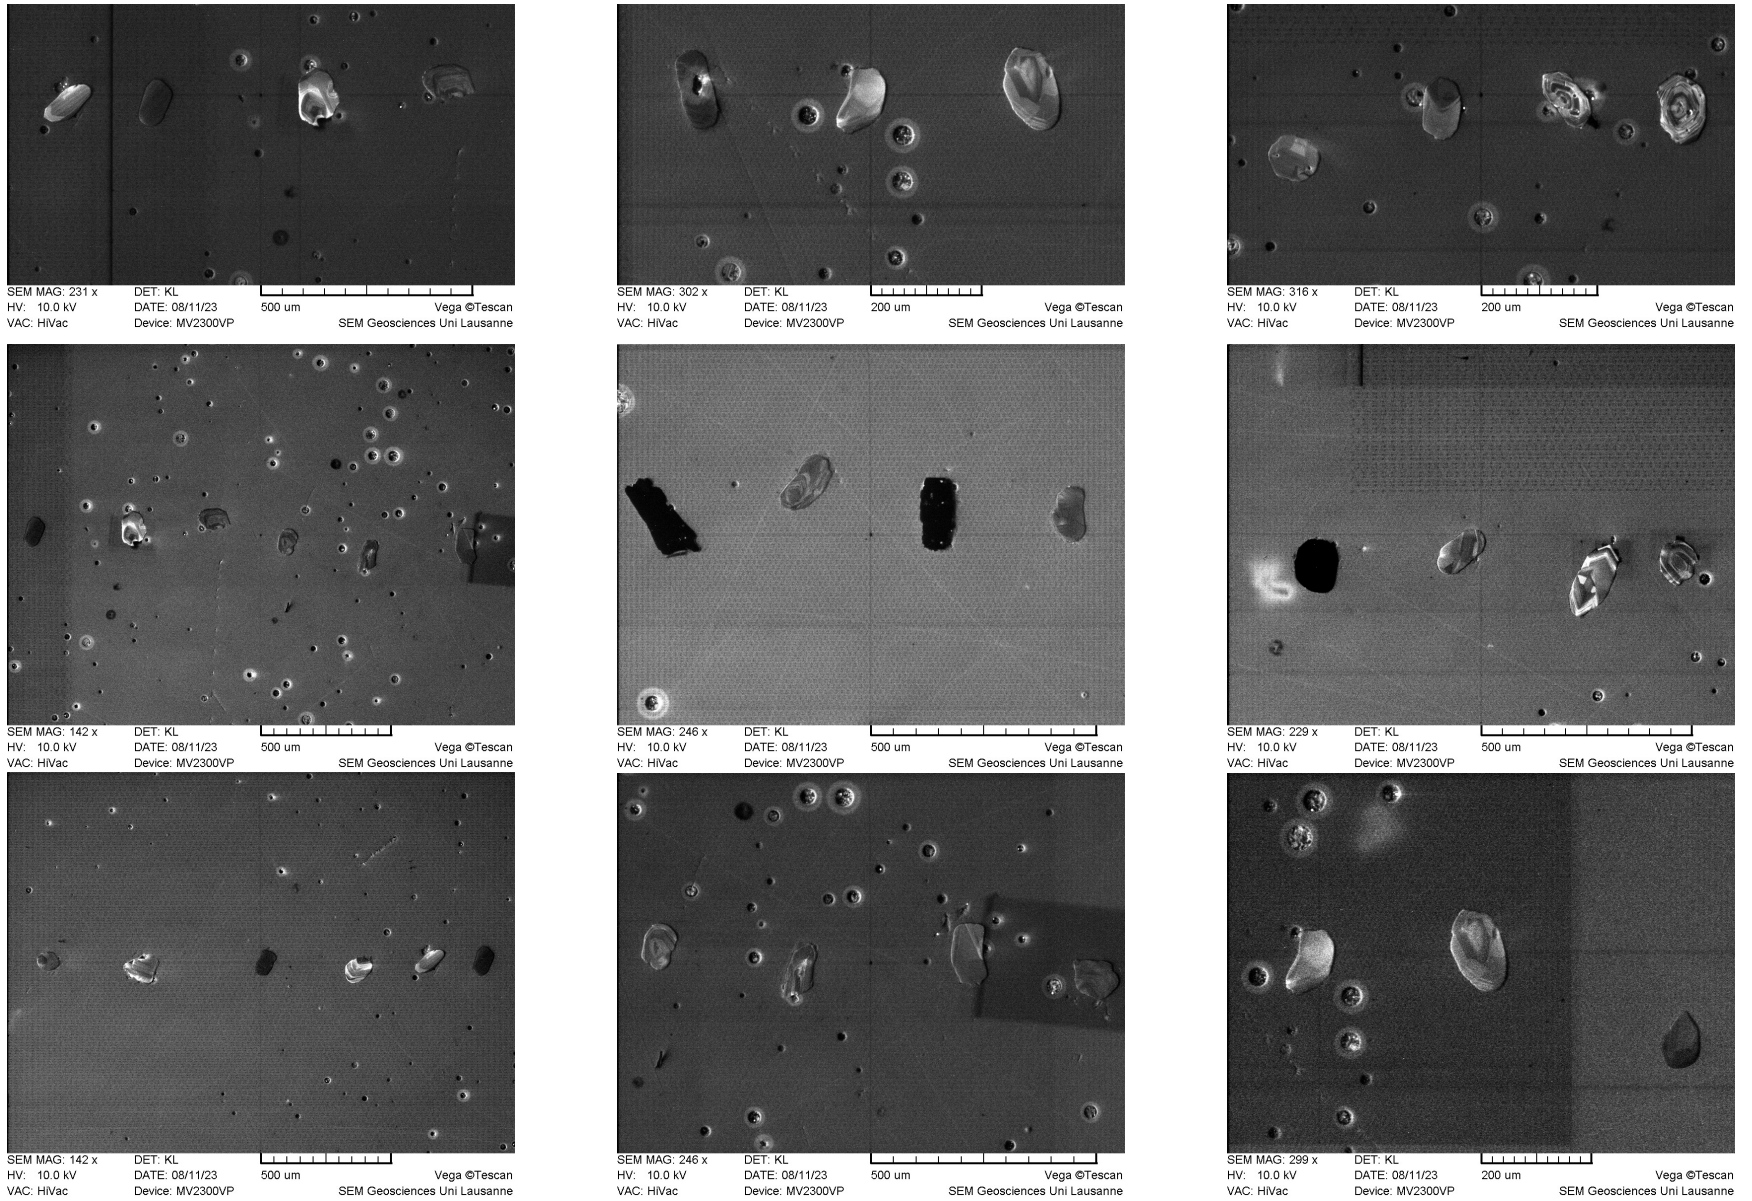

Figure S5. Cathodoluminescence images of the zircon sample Can1.

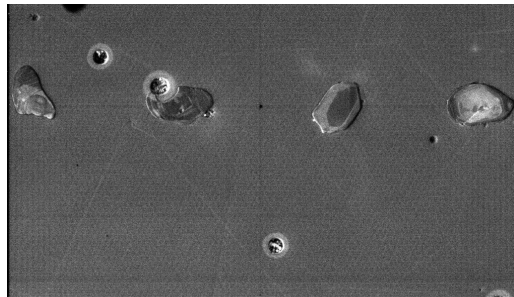

SEM MAG: 262 x DET: KL  
HV: 10.0 kV DATE: 08/11/23 Vega ©Tescan  
VAC: HiVac Device: MV2300VP SEM Geosciences Uni Lausanne

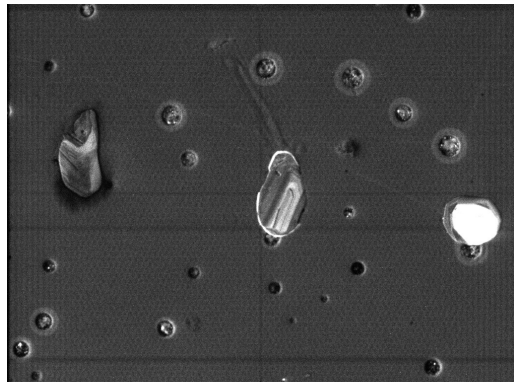

SEM MAG: 374 x DET: KL  
HV: 10.0 kV DATE: 08/11/23 Vega ©Tescan  
VAC: HiVac Device: MV2300VP SEM Geosciences Uni Lausanne

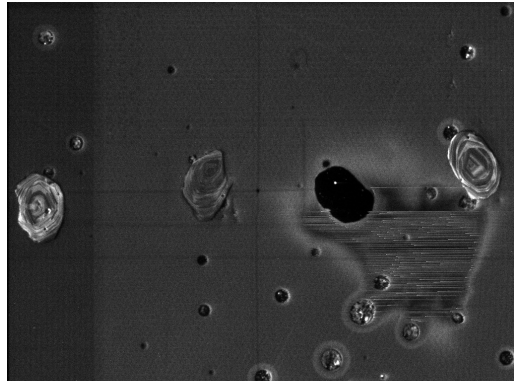

SEM MAG: 316 x DET: KL  
HV: 10.0 kV DATE: 08/11/23 Vega ©Tescan  
VAC: HiVac Device: MV2300VP SEM Geosciences Uni Lausanne

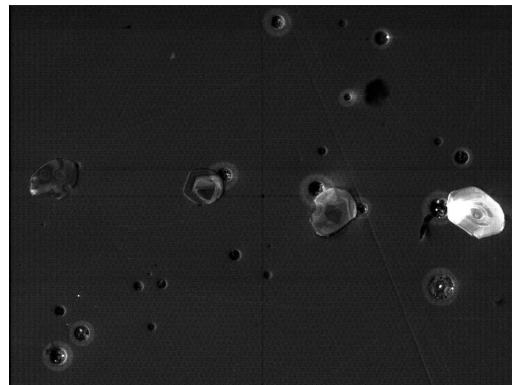

SEM MAG: 256 x DET: KL  
HV: 10.0 kV DATE: 08/11/23 Vega ©Tescan  
VAC: HiVac Device: MV2300VP SEM Geosciences Uni Lausanne

Figure S6. Cathodoluminescence images of the zircon sample Can1.











**Table S5.** Results of OSL decay curve decomposition into up to three components. For further details, see main text.

| ZR229  |                               |                               | ZR229-PH                      |        |                               | Can1                          |                               |        |                               |                               |                               |
|--------|-------------------------------|-------------------------------|-------------------------------|--------|-------------------------------|-------------------------------|-------------------------------|--------|-------------------------------|-------------------------------|-------------------------------|
| Hole # | Comp. 1<br>[cm <sup>2</sup> ] | Comp. 2<br>[cm <sup>2</sup> ] | Comp. 3<br>[cm <sup>2</sup> ] | Hole # | Comp. 1<br>[cm <sup>2</sup> ] | Comp. 2<br>[cm <sup>2</sup> ] | Comp. 3<br>[cm <sup>2</sup> ] | Hole # | Comp. 1<br>[cm <sup>2</sup> ] | Comp. 2<br>[cm <sup>2</sup> ] | Comp. 3<br>[cm <sup>2</sup> ] |
| 1      | 3.19E-19                      | 1.23E-21                      | NA                            | 1      | NA                            | NA                            | NA                            | 1      | 1.25E-19                      | 8.01E-21                      | NA                            |
| 2      | 7.86E-21                      | NA                            | NA                            | 2      | 1.58E-19                      | 7.15E-21                      | NA                            | 2      | 1.68E-19                      | NA                            | NA                            |
| 3      | 6.64E-20                      | 2.64E-21                      | NA                            | 3      | 4.58E-21                      | NA                            | NA                            | 3      | 1.24E-19                      | 2.55E-21                      | NA                            |
| 4      | 2.96E-19                      | 1.77E-21                      | NA                            | 4      | 1.96E-19                      | 5.40E-20                      | 6.20E-21                      | 4      | 6.70E-20                      | 3.67E-21                      | NA                            |
| 5      | NA                            | NA                            | NA                            | 5      | 8.90E-20                      | 8.93E-21                      | NA                            | 5      | 8.37E-20                      | 1.59E-21                      | NA                            |
| 6      | 1.32E-19                      | 1.36E-21                      | NA                            | 6      | 9.85E-21                      | NA                            | NA                            | 6      | 3.19E-21                      | NA                            | NA                            |
| 7      | NA                            | NA                            | NA                            | 7      | 1.70E-19                      | 4.87E-21                      | NA                            | 7      | 2.48E-19                      | 5.84E-21                      | NA                            |
| 8      | 5.24E-22                      | NA                            | NA                            | 8      | 2.74E-20                      | NA                            | NA                            | 8      | 1.70E-19                      | 6.39E-21                      | NA                            |
| 9      | 1.72E-19                      | 5.68E-21                      | NA                            | 9      | 2.14E-19                      | 7.15E-21                      | NA                            | 9      | 1.46E-19                      | 3.32E-21                      | NA                            |
| 10     | 1.15E-21                      | NA                            | NA                            | 10     | 1.00E-19                      | 4.75E-21                      | NA                            | 10     | 9.93E-20                      | 2.05E-21                      | NA                            |
| 11     | 1.77E-19                      | 3.88E-21                      | NA                            | 11     | 6.98E-21                      | NA                            | NA                            | 11     | 2.40E-22                      | NA                            | NA                            |
| 12     | 1.64E-19                      | 7.52E-21                      | NA                            | 12     | 1.12E-19                      | 1.16E-20                      | NA                            | 12     | 9.19E-21                      | NA                            | NA                            |
| 13     | 2.65E-19                      | 4.75E-20                      | 3.53E-21                      | 13     | 1.18E-20                      | NA                            | NA                            | 13     | 5.86E-21                      | NA                            | NA                            |
| 14     | 9.82E-20                      | 2.43E-21                      | NA                            | 14     | 1.88E-19                      | 9.15E-21                      | NA                            | 14     | 1.98E-19                      | 1.10E-20                      | NA                            |
| 15     | 2.63E-19                      | 8.42E-21                      | NA                            | 15     | 1.95E-19                      | 5.75E-21                      | NA                            | 15     | 4.84E-21                      | NA                            | NA                            |
| 16     | 1.38E-19                      | 6.84E-21                      | NA                            | 16     | 1.40E-19                      | 1.06E-20                      | NA                            | 16     | 1.80E-19                      | 1.05E-20                      | NA                            |
| 17     | 9.80E-20                      | 3.94E-21                      | NA                            | 17     | 1.20E-19                      | 4.17E-21                      | NA                            | 17     | 1.27E-19                      | 1.07E-20                      | NA                            |
| 18     | 1.45E-19                      | 3.73E-21                      | NA                            | 18     | 7.94E-20                      | 1.35E-21                      | NA                            | 18     | 2.44E-19                      | 2.52E-20                      | 1.31E-21                      |
| 19     | 6.57E-21                      | NA                            | NA                            | 19     | 3.00E-20                      | 7.14E-21                      | NA                            | 19     | 1.97E-19                      | 4.57E-21                      | NA                            |
| 20     | 6.29E-21                      | NA                            | NA                            | 20     | 1.47E-19                      | 7.81E-21                      | NA                            | 20     | 5.19E-20                      | 5.06E-22                      | NA                            |
| 21     | 8.55E-20                      | NA                            | NA                            | 21     | NA                            | NA                            | NA                            | 21     | 4.12E-21                      | NA                            | NA                            |
| 22     | 5.24E-21                      | NA                            | NA                            | 22     | 7.26E-20                      | NA                            | NA                            | 22     | 1.02E-19                      | 5.11E-21                      | NA                            |
| 23     | 1.20E-19                      | 1.51E-21                      | NA                            | 23     | 1.51E-19                      | 6.10E-21                      | NA                            | 23     | 7.09E-20                      | 2.02E-20                      | 3.68E-21                      |
| 24     | 2.17E-19                      | 1.69E-21                      | NA                            | 24     | 8.77E-20                      | 4.88E-21                      | NA                            | 24     | 1.05E-19                      | 5.23E-21                      | NA                            |
| 25     | 1.74E-19                      | 4.12E-21                      | NA                            | 25     | 2.06E-19                      | 1.03E-20                      | NA                            | 25     | 2.37E-19                      | 1.14E-20                      | NA                            |
| 26     | 1.17E-19                      | 2.29E-21                      | NA                            | 26     | 2.29E-19                      | 9.26E-21                      | NA                            | 26     | 1.48E-19                      | 5.61E-21                      | NA                            |
| 27     | 1.62E-19                      | 3.68E-21                      | NA                            | 27     | 9.28E-20                      | NA                            | NA                            | 27     | 1.28E-19                      | 6.83E-21                      | NA                            |
| 28     | 1.64E-19                      | 4.42E-21                      | NA                            | 28     | 1.26E-19                      | 4.77E-21                      | NA                            | 28     | 1.57E-19                      | 9.07E-21                      | NA                            |
| 29     | 2.61E-21                      | NA                            | NA                            | 29     | 3.66E-21                      | NA                            | NA                            | 29     | 1.28E-19                      | 4.45E-21                      | NA                            |
| 30     | NA                            | NA                            | NA                            | 30     | 1.31E-19                      | 7.45E-21                      | NA                            | 30     | 2.86E-19                      | 5.94E-21                      | NA                            |
| 31     | 2.19E-19                      | 4.90E-21                      | NA                            | 31     | 1.46E-19                      | 8.93E-21                      | NA                            | 31     | 4.47E-20                      | NA                            | NA                            |
| 32     | 1.59E-19                      | 2.41E-21                      | NA                            | 32     | 3.71E-20                      | NA                            | NA                            | 32     | 1.30E-20                      | NA                            | NA                            |
| 33     | 1.91E-19                      | 2.10E-21                      | NA                            | 33     | 1.58E-19                      | 1.11E-20                      | NA                            | 33     | 1.89E-19                      | 4.13E-20                      | 4.63E-21                      |
| 34     | 1.77E-20                      | NA                            | NA                            | 34     | 2.95E-20                      | NA                            | NA                            | 34     | 6.75E-20                      | 4.50E-21                      | NA                            |
| 35     | 2.42E-19                      | 5.13E-20                      | 5.47E-21                      | 35     | 1.93E-19                      | 1.11E-20                      | NA                            | 35     | 3.12E-21                      | NA                            | NA                            |
| 36     | NA                            | NA                            | NA                            | 36     | 9.85E-20                      | 5.65E-21                      | NA                            | 36     | 2.05E-19                      | 3.30E-20                      | 1.31E-21                      |
| 37     | 2.49E-19                      | NA                            | NA                            | 37     | 6.40E-20                      | 8.19E-21                      | NA                            | 37     | 2.60E-20                      | 2.50E-21                      | NA                            |
| 38     | 1.84E-19                      | 5.97E-21                      | NA                            | 38     | 4.59E-22                      | NA                            | NA                            | 38     | 3.28E-20                      | NA                            | NA                            |
| 39     | 1.37E-19                      | 2.38E-21                      | NA                            | 39     | 3.72E-21                      | NA                            | NA                            | 39     | 1.58E-19                      | 1.98E-20                      | 1.80E-21                      |
| 40     | 1.32E-21                      | NA                            | NA                            | 40     | 1.62E-19                      | 3.32E-20                      | 6.09E-21                      | 40     | 2.50E-19                      | 9.89E-21                      | NA                            |
| 41     | 1.19E-19                      | NA                            | NA                            | 41     | 1.22E-21                      | NA                            | NA                            | 41     | 1.54E-19                      | 1.29E-20                      | 7.70E-22                      |
| 42     | 1.40E-19                      | 4.15E-20                      | 6.80E-21                      | 42     | 2.11E-19                      | 7.35E-21                      | NA                            | 42     | 1.07E-19                      | 5.68E-21                      | NA                            |
| 43     | 1.65E-19                      | 4.03E-21                      | NA                            | 43     | 2.29E-19                      | 1.38E-20                      | NA                            | 43     | 1.56E-19                      | 2.73E-21                      | NA                            |
| 44     | 9.30E-20                      | 5.53E-21                      | NA                            | 44     | 2.11E-19                      | 1.21E-20                      | NA                            | 44     | 2.28E-19                      | 4.25E-21                      | NA                            |
| 45     | 5.89E-20                      | NA                            | NA                            | 45     | 2.56E-20                      | 6.76E-21                      | NA                            | 45     | 1.14E-19                      | 8.95E-21                      | NA                            |
| 46     | 2.61E-19                      | 9.99E-21                      | NA                            | 46     | 1.48E-19                      | 6.60E-21                      | NA                            | 46     | 1.07E-19                      | 6.77E-21                      | NA                            |
| 47     | 1.76E-19                      | 1.97E-21                      | NA                            | 47     | 9.86E-20                      | 5.14E-21                      | NA                            | 47     | 3.15E-21                      | NA                            | NA                            |
| 48     | 1.66E-19                      | 4.38E-21                      | NA                            | 48     | 6.37E-21                      | NA                            | NA                            | 48     | 3.83E-20                      | NA                            | NA                            |
| 49     | 1.69E-19                      | 1.19E-20                      | NA                            | 49     | 2.31E-19                      | 7.08E-21                      | NA                            | 49     | 7.96E-20                      | 1.58E-21                      | NA                            |
| 50     | 1.57E-19                      | 4.58E-21                      | NA                            | 50     | 1.67E-19                      | 7.29E-21                      | NA                            | 50     | 8.37E-20                      | 3.95E-21                      | NA                            |
| 51     | 1.60E-19                      | 8.02E-21                      | NA                            | 51     | 1.53E-19                      | 8.62E-21                      | NA                            | 51     | 1.47E-19                      | 3.34E-21                      | NA                            |
| 52     | 2.98E-20                      | NA                            | NA                            | 52     | 1.32E-19                      | 5.51E-21                      | NA                            | 52     | 2.59E-19                      | 2.11E-21                      | NA                            |
| 53     | 2.87E-19                      | 8.12E-21                      | NA                            | 53     | 6.30E-21                      | NA                            | NA                            | 53     | 1.08E-19                      | 2.32E-20                      | 2.38E-21                      |
| 54     | 1.39E-19                      | 3.44E-21                      | NA                            | 54     | 2.12E-19                      | 4.18E-20                      | 6.04E-21                      | 54     | 1.18E-19                      | 6.83E-21                      | NA                            |
| 55     | 4.48E-20                      | NA                            | NA                            | 55     | 9.09E-20                      | 6.99E-21                      | NA                            | 55     | 7.64E-20                      | 4.82E-21                      | NA                            |
| 56     | 2.83E-20                      | NA                            | NA                            | 56     | 8.14E-20                      | 1.78E-21                      | NA                            | 56     | 2.20E-19                      | 3.23E-20                      | 1.68E-21                      |
| 57     | 5.50E-20                      | NA                            | NA                            | 57     | 1.14E-19                      | 4.74E-21                      | NA                            | 57     | 5.95E-20                      | 2.69E-21                      | NA                            |
| 58     | 1.41E-19                      | 4.25E-21                      | NA                            | 58     | 8.52E-21                      | NA                            | NA                            | 58     | 6.65E-20                      | 5.57E-21                      | NA                            |
| 59     | 2.96E-21                      | NA                            | NA                            | 59     | 5.83E-20                      | NA                            | NA                            | 59     | 2.81E-20                      | NA                            | NA                            |
| 60     | NA                            | NA                            | NA                            | 60     | 3.00E-19                      | 1.25E-20                      | NA                            | 60     | 2.73E-20                      | 2.63E-21                      | NA                            |
| 61     | 1.44E-19                      | 2.19E-21                      | NA                            | 61     | 5.29E-21                      | NA                            | NA                            | 61     | 3.72E-21                      | NA                            | NA                            |
| 62     | NA                            | NA                            | NA                            | 62     | 1.78E-20                      | NA                            | NA                            | 62     | 1.24E-19                      | 2.77E-20                      | 5.21E-21                      |
| 63     | 1.24E-19                      | 4.27E-21                      | NA                            | 63     | 1.78E-19                      | 1.73E-20                      | 2.82E-21                      | 63     | 2.49E-19                      | 4.06E-20                      | 3.63E-21                      |
| 64     | 5.18E-20                      | NA                            | NA                            | 64     | 5.18E-20                      | 3.37E-21                      | NA                            | 64     | 3.88E-21                      | NA                            | NA                            |
| 65     | 2.84E-19                      | 4.82E-20                      | 4.42E-21                      | 65     | 2.69E-19                      | 8.01E-21                      | NA                            | 65     | 4.72E-20                      | 1.36E-21                      | NA                            |
| 66     | 2.07E-19                      | 3.30E-21                      | NA                            | 66     | 6.15E-20                      | 5.14E-21                      | NA                            | 66     | 2.16E-19                      | 1.34E-20                      | NA                            |
| 67     | 1.34E-19                      | 5.17E-21                      | NA                            | 67     | 2.05E-19                      | 4.50E-21                      | NA                            | 67     | 9.75E-20                      | 6.75E-21                      | NA                            |
| 68     | 6.22E-20                      | NA                            | NA                            | 68     | 8.08E-20                      | 7.35E-21                      | NA                            | 68     | 1.32E-19                      | 3.02E-21                      | NA                            |
| 69     | 4.39E-20                      | NA                            | NA                            | 69     | 1.87E-19                      | 6.49E-21                      | NA                            | 69     | 1.00E-19                      | 4.44E-21                      | NA                            |
| 70     | 1.72E-19                      | 7.93E-21                      | NA                            | 70     | 1.79E-19                      | 3.08E-20                      | 4.19E-21                      | 70     | 1.76E-19                      | 9.38E-21                      | NA                            |
| 71     | 2.14E-19                      | 7.73E-21                      | NA                            | 71     | 1.43E-19                      | 6.17E-21                      | NA                            | 71     | 3.06E-20                      | NA                            | NA                            |

|     |          |          |          |     |          |          |          |     |          |          |          |
|-----|----------|----------|----------|-----|----------|----------|----------|-----|----------|----------|----------|
| 72  | 1.91E-19 | 6.80E-21 | NA       | 72  | 2.50E-20 | NA       | NA       | 72  | 1.15E-20 | NA       | NA       |
| 73  | 6.19E-20 | NA       | NA       | 73  | 1.64E-19 | 3.26E-20 | 6.42E-21 | 73  | 2.22E-19 | 5.70E-21 | NA       |
| 74  | 1.46E-19 | 6.03E-21 | NA       | 74  | 1.54E-19 | 8.61E-21 | NA       | 74  | 1.68E-19 | 2.73E-20 | 3.59E-21 |
| 75  | 8.32E-20 | 3.44E-21 | NA       | 75  | 6.25E-21 | NA       | NA       | 75  | 7.90E-20 | 6.14E-21 | NA       |
| 76  | 1.56E-19 | 5.70E-21 | NA       | 76  | 1.56E-19 | 1.05E-20 | NA       | 76  | 1.49E-19 | 5.27E-21 | NA       |
| 77  | 5.94E-21 | NA       | NA       | 77  | 8.72E-20 | 6.48E-21 | NA       | 77  | 1.75E-19 | 1.22E-20 | NA       |
| 78  | 2.49E-19 | 4.93E-21 | NA       | 78  | 4.97E-21 | NA       | NA       | 78  | 9.61E-20 | 1.01E-20 | NA       |
| 79  | 8.47E-20 | 3.50E-21 | NA       | 79  | 1.65E-20 | NA       | NA       | 79  | 2.81E-19 | 4.79E-21 | NA       |
| 80  | 1.78E-19 | 5.93E-21 | NA       | 80  | 1.68E-19 | 4.73E-21 | NA       | 80  | 6.92E-20 | NA       | NA       |
| 81  | 2.84E-21 | NA       | NA       | 81  | 1.54E-19 | 5.60E-21 | NA       | 81  | 1.11E-19 | 2.54E-20 | 1.60E-21 |
| 82  | 1.94E-19 | 1.27E-20 | NA       | 82  | 1.83E-21 | NA       | NA       | 82  | 1.31E-19 | 2.17E-21 | NA       |
| 83  | 2.33E-19 | 1.20E-20 | NA       | 83  | 2.25E-20 | NA       | NA       | 83  | 2.63E-19 | 4.88E-21 | NA       |
| 84  | 1.49E-19 | 7.30E-21 | NA       | 84  | 1.49E-19 | 8.68E-21 | NA       | 84  | 8.27E-20 | 3.49E-21 | NA       |
| 85  | 1.93E-19 | 6.70E-21 | NA       | 85  | 1.26E-19 | 7.74E-21 | NA       | 85  | 7.42E-20 | 1.76E-21 | NA       |
| 86  | 2.30E-19 | 9.70E-21 | NA       | 86  | 8.79E-20 | NA       | NA       | 86  | 2.15E-20 | NA       | NA       |
| 87  | 9.79E-20 | 5.43E-21 | NA       | 87  | NA       | NA       | NA       | 87  | 2.92E-21 | NA       | NA       |
| 88  | 2.71E-19 | 3.70E-20 | 4.82E-21 | 88  | 9.41E-20 | 1.93E-21 | NA       | 88  | 1.19E-19 | 2.31E-21 | NA       |
| 89  | 3.78E-20 | NA       | NA       | 89  | 1.37E-19 | 1.02E-20 | NA       | 89  | 1.14E-20 | NA       | NA       |
| 90  | 1.08E-19 | 4.36E-21 | NA       | 90  | 7.11E-20 | NA       | NA       | 90  | 6.68E-21 | NA       | NA       |
| 91  | 1.43E-19 | 4.13E-21 | NA       | 91  | 7.34E-21 | NA       | NA       | 91  | 5.22E-20 | NA       | NA       |
| 92  | 1.05E-19 | 1.71E-21 | NA       | 92  | 3.04E-20 | NA       | NA       | 92  | 2.02E-19 | 5.98E-21 | NA       |
| 93  | 1.57E-19 | 7.97E-21 | NA       | 93  | 3.69E-20 | NA       | NA       | 93  | 6.33E-20 | 6.68E-21 | NA       |
| 94  | 1.82E-19 | 3.84E-21 | NA       | 94  | 3.00E-20 | NA       | NA       | 94  | 5.36E-20 | NA       | NA       |
| 95  | 9.09E-20 | NA       | NA       | 95  | 2.16E-19 | 2.59E-20 | 3.46E-21 | 95  | 1.35E-19 | 3.56E-20 | 4.87E-21 |
| 96  | 2.73E-19 | 3.32E-21 | NA       | 96  | 1.32E-19 | 3.97E-21 | NA       | 96  | 1.08E-19 | 6.87E-21 | NA       |
| 97  | 1.20E-19 | 7.15E-21 | NA       | 97  | 2.11E-19 | 5.59E-21 | NA       | 97  | 3.66E-20 | 2.39E-21 | NA       |
| 98  | 8.27E-20 | NA       | NA       | 98  | 1.94E-20 | NA       | NA       | 98  | 2.50E-19 | 1.31E-20 | NA       |
| 99  | 2.09E-19 | 3.52E-20 | 2.39E-21 | 99  | 1.37E-19 | 8.29E-21 | NA       | 99  | 1.72E-19 | 1.14E-20 | NA       |
| 100 | NA       | NA       | NA       | 100 | 3.49E-20 | NA       | NA       | 100 | 9.67E-20 | 7.63E-21 | NA       |

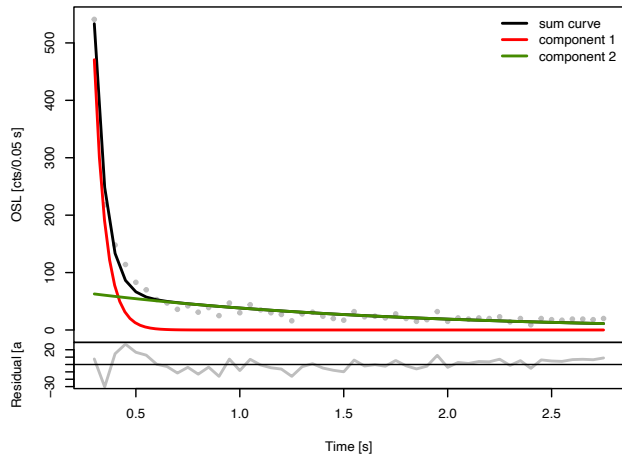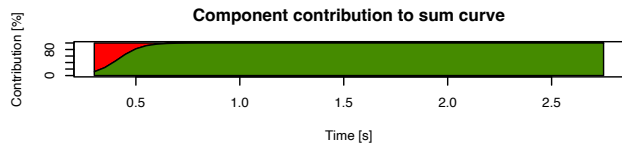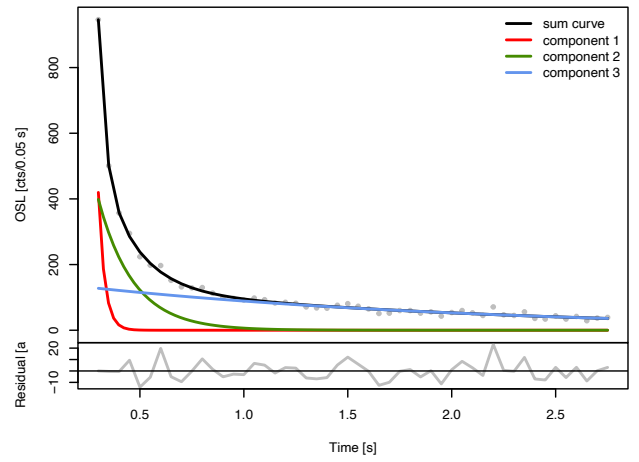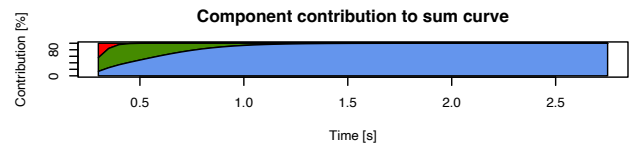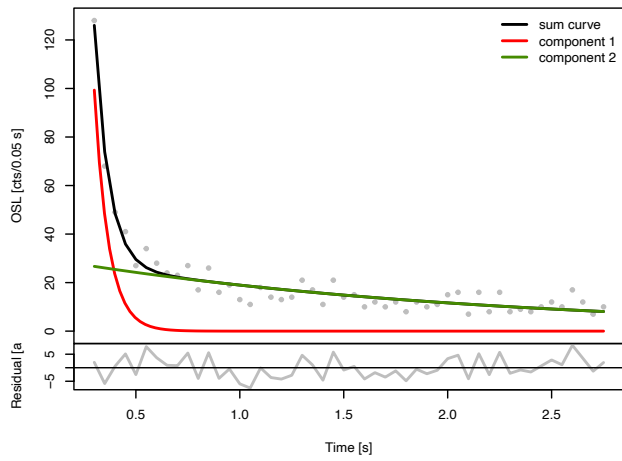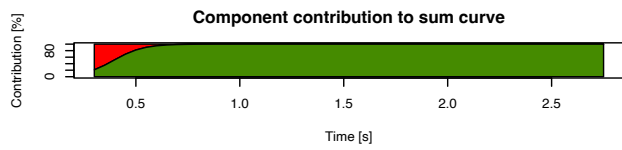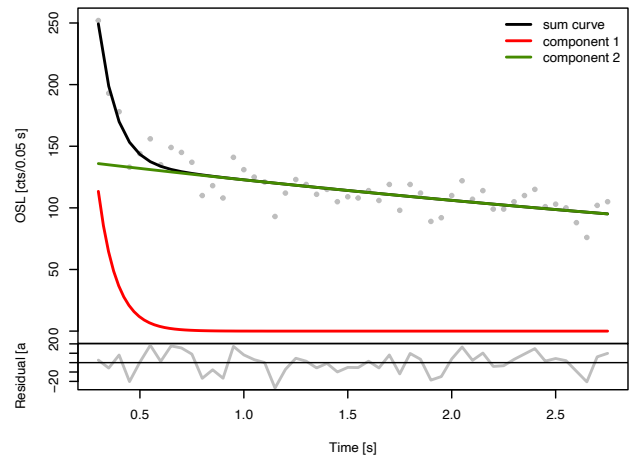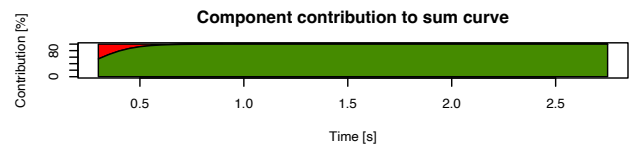

Figure S7. OSL decomposition of four randomly selected signals of sample ZR229.

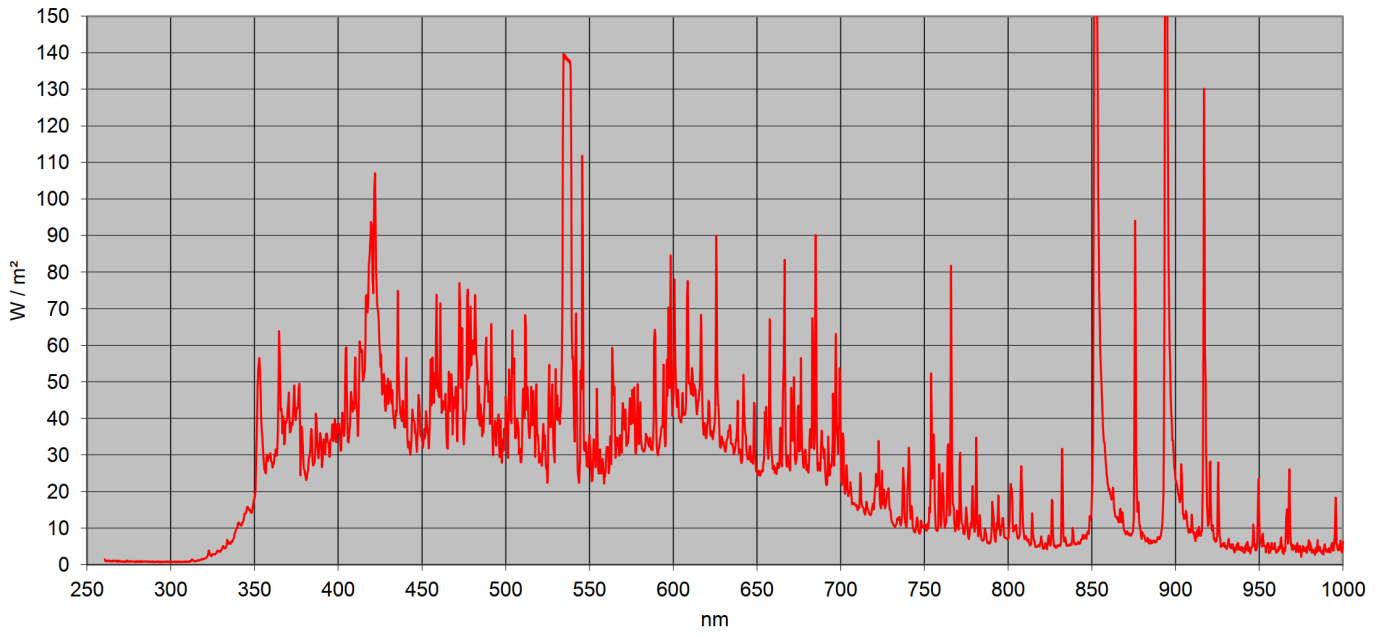

**Figure S8.** Emission spectrum of the bulb built in the Hönle UVACube 400 used to bleach the zircon samples (data from the manufacturer).
